# Supplementary material for: Evaluating Pillar Industry’s Transformation Capability: A Case Study of Two Chinese Steel-Based Cities
Source: PLoS One. 2015 Sep 30;10(9):e0139576. doi: 10.1371/journal.pone.0139576 (PMC4589354; doi:10.1371/journal.pone.0139576)
Supplement: S8 Table — (XLSX) [file pone.0139576.s008.xlsx]

## Sheet: weight of indicator1
			S8. Table. Indicator weights
			Weight of indicator 1
				GDP	Profit rate	Pollution control	Per capita output value	Investment growth RATE	Output valur growth rate	accumulation	A^n	WI	AWI	awi/wi	ci	ir	cr
			Output value growth rate	1	2	3	4	5	6	720	2.9938	0.380626	2.34402	6.15832
			Profit rate	0.5	1	2	3	4	5	60	1.9786	0.251556	1.53433	6.09935
			Pollution control	0.333333	0.5	1	2	3	4	4	1.25992	0.160184	0.977296	6.10108
			Per capita output value	0.25	0.333333	0.5	1	2	3	0.25	0.793701	0.10091	0.615925	6.10373
			Investment growth rate	0.2	0.25	0.333333	0.5	1	2	0.0166667	0.505407	0.0642566	0.392055	6.1014
			Patent	0.166667	0.2	0.25	0.333333	0.5	1	0.00138889	0.334024	0.0424673	0.262027	6.1701	0.0244655	1.26	0.0194171
											7.86545			6.12233
			Weight of indicator 2
				GDP	Profit rate	Pollution control	Per capita output value	Investment growth RATE	Output valur growth rate	Accumulation	A^n	WI	AWI	awi/wi	ci	ir	cr
			GDP growth rate	1	2	3	4	5	6	120	2.22091	0.379956	2.24836	5.91741
			Profit rate	0.5	1	2	3	4	5	12	1.51309	0.258861	1.43834	5.5564
			Pollution control	0.333333	0.5	1	2	3	4	1	1	0.171082	0.884398	5.16945
			Per capita GDP	0.25	0.333333	0.5	1	2	3	0.0833333	0.660901	0.113068	0.53395	4.72238
			Investment growth rate	0.2	0.25	0.333333	0.5	1	2	0.00833333	0.450267	0.0770324	0.3313	4.30079
			Patent	0.166667	0.2	0.25	0.333333	0.5	1	0.00138889	0.334024	0.0571454	0.234074	4.09612	0.0333212	1.12	0.0297511
											5.84516			5.13328
			Weight of indicator 3
				GDP	Per capita	Structure	Saving	Funding	Consumption	Accumulation	A^n	WI	AWI	awi/wi	ci	ir	cr
			GDP growth rate	1	1	3	4	5	5	300	2.58734	0.341496	2.08937	6.11828
			Per capita GDP	1	1	2	3	4	4	96	2.13983	0.28243	1.71329	6.06626
			Industry structure	0.333333	0.5	1	2	3	3	3	1.20094	0.158508	0.96834	6.10908
			Saving	0.25	0.333333	0.5	1	2	2	0.166667	0.741836	0.0979129	0.59599	6.08694
			Funding	0.2	0.25	0.333333	0.5	1	2	0.0166667	0.505407	0.0667073	0.413298	6.19569
			Consumption	0.2	0.25	0.333333	0.5	0.5	1	0.00416667	0.401142	0.0529456	0.326999	6.17612	0.0250789	1.26	0.0199039
											7.57649			6.12539
			Weight of indicator 4
				Planning	Resource	Collaboration			wi	awi		ci
			Planning	1	3	4	12	2.28943	0.625013	1.88647	3.01829
			Resource	0.333333	1	2	0.666667	0.87358	0.238487	0.719824	3.01829
			Collaboration	0.25	0.5	1	0.125	0.5	0.1365	0.411997	3.01829
								3.66301			3.01829	0.00914735	0.52	0.0175911
			Weight of indicator 5
				Energy consumption	Emissions	Investment	Environmental protection			wi	awi		ci		cr
			Energy consumption	1	1	3	3	9	1.73205	0.375	1.5	4	0
			Emission	1	1	3	3	9	1.73205	0.375	1.5	4
			Investment	0.333333	0.333333	1	1	0.111111	0.57735	0.125	0.5	4
			Environmental protection	0.333333	0.333333	1	1	0.111111	0.57735	0.125	0.5	4
									4.6188			4
