# Supplementary material for: Evaluating Pillar Industry’s Transformation Capability: A Case Study of Two Chinese Steel-Based Cities
Source: PLoS One. 2015 Sep 30;10(9):e0139576. doi: 10.1371/journal.pone.0139576 (PMC4589354; doi:10.1371/journal.pone.0139576)
Supplement: S18 Table — (XLSX) [file pone.0139576.s018.xlsx]

## Sheet: Development Capacity
	S18. Table. Substitute industries’ development capacity, Panzhihua and Daye
		excellent	good	average	worse	bad
	Panzhihua	0.131546	0.356248	0.342715	0.110833	0.0586575
	Daye	0.0917899	0.3106	0.421017	0.114203	0.0623893
